# Supplementary material for: Fitness Cost of Antiretroviral Drug Resistance Mutations on the pol Gene during Analytical Antiretroviral Treatment Interruption among Individuals Experiencing Virological Failure
Source: MDPI journal article supplement (doi:10.3390/pathogens10111425), 2021-11-03
Supplement: s1 [file s1]

|            |          |           | Reversion Group |        |        |         |
|------------|----------|-----------|-----------------|--------|--------|---------|
|            |          |           | None            | Low    | High   |         |
| Viral Load | Baseline | Mean      | 5.11            | 5.08   | 4.76   |         |
|            |          | Std. Dev. | 0.73            | 0.35   | 0.53   |         |
|            | Week 4   | Mean      | 5.22            | 5.58   | 5.29   |         |
|            |          | Std. Dev. | 0.61            | 0.27   | 0.61   |         |
|            | Week 8   | Mean      | 5.39            | 5.71   | 5.34   |         |
|            |          | Std. Dev. | 0.61            | 0.37   | 0.62   |         |
|            | Week 12  | Mean      | 5.25            | 5.91   | 5.51   |         |
|            |          | Std. Dev. | 0.62            | 0.46   | 0.51   |         |
|            | CD4+     | Baseline  | Mean            | 244.08 | 229.00 | 266.25  |
|            |          |           | Std. Dev.       | 185.35 | 173.80 | 113.11  |
|            |          | Week 4    | Mean            | 224.62 | 193.93 | 207.63  |
|            |          |           | Std. Dev.       | 187.60 | 146.06 | 72.25   |
| Week 8     |          | Mean      | 209.15          | 145.60 | 196.13 |         |
|            |          | Std. Dev. | 179.10          | 123.46 | 104.41 |         |
| Week 12    |          | Mean      | 163.54          | 120.53 | 155.13 |         |
|            |          | Std. Dev. | 142.90          | 131.91 | 110.57 |         |
| CD8+       |          | Baseline  | Mean            | 806.92 | 866.47 | 1168.25 |
|            |          |           | Std. Dev.       | 480.38 | 426.25 | 943.21  |
|            |          | Week 4    | Mean            | 808.85 | 970.73 | 1057.63 |
|            |          |           | Std. Dev.       | 552.45 | 449.64 | 516.69  |
|            | Week 8   | Mean      | 924.00          | 848.33 | 927.63 |         |
|            |          | Std. Dev. | 494.44          | 409.64 | 563.85 |         |
|            | Week 12  | Mean      | 733.62          | 785.00 | 785.88 |         |
|            |          | Std. Dev. | 431.92          | 472.76 | 356.40 |         |
