# Supplementary material for: Fitness Cost of Antiretroviral Drug Resistance Mutations on the pol Gene during Analytical Antiretroviral Treatment Interruption among Individuals Experiencing Virological Failure
Source: MDPI journal article supplement (doi:10.3390/pathogens10111425), 2021-11-03
Supplement: s1 [file s1]

| Study – 1 <sup>st</sup> Author | Year | Journal | Participants |
|--------------------------------|------|---------|--------------|
| Miller                         | 2000 | AIDS    | 48           |
| Katlama                        | 2004 | AIDS    | 68           |
| Deveraux                       | 1999 | AIDS    | 25           |
| Izopet                         | 2000 | AIDS    | 38           |
| Deeks                          | 2003 | AIDS    | 24           |
| Neumann                        | 1999 | AIDS    | 10           |
| Papasavvas                     | 2003 | AIDS    | 11           |
| Harrigan                       | 1999 | AIDS    | 6            |
| Garcia                         | 1999 | AIDS    | 8            |
| Deeks                          | 2001 | NEJM    | 16           |
| Dybul                          | 2001 | PNAS    | 10           |
| Aranowich                      | 2003 | AIDS    | 36           |
| Maggiolo                       | 2004 | AIDS    | 69           |

### Journal Names

| Abbreviation | Full Journal Name                                 |
|--------------|---------------------------------------------------|
| AIDS         | AIDS: A Journal of the International AIDS Society |
| NEJM         | New England Journal of Medicine                   |
| PNAS         | Proceedings of the National Academy of Sciences   |
