# Supplementary material for: Fitness Cost of Antiretroviral Drug Resistance Mutations on the pol Gene during Analytical Antiretroviral Treatment Interruption among Individuals Experiencing Virological Failure
Source: MDPI journal article supplement (doi:10.3390/pathogens10111425), 2021-11-03
Supplement: s1 [file s1]

| Patient No. | Viral Load |           |           |           | CD4+     |        |        |         | CD8+     |        |        |         |
|-------------|------------|-----------|-----------|-----------|----------|--------|--------|---------|----------|--------|--------|---------|
|             | Baseline   | Week 4    | Week 8    | Week 12   | Baseline | Week 4 | Week 8 | Week 12 | Baseline | Week 4 | Week 8 | Week 12 |
| 1           | 130,000    | 260,000   | 480,000   | 400,000   | 615      | 505    | 425    | 503     | 1,668    | 1,174  | 1,008  | 1,470   |
| 2           | 17,000     | 450,000   | 200,000   | 350,000   | 590      | 213    | 201    | 253     | 1,414    | 862    | 714    | 675     |
| 3           | 290,000    | 350,000   | 230,000   | 320,000   | 468      | 301    | 345    | 205     | 2,791    | 1,699  | 2,001  | 1,197   |
| 4           | 290,000    | 270,000   | 280,000   | 360,000   | 409      | 289    | 239    | 187     | 1,362    | 1,860  | 1,372  | 1,130   |
| 5           | 98,000     | 150,000   | 290,000   | 710,000   | 218      | 163    | 124    | 81      | 630      | 931    | 875    | 596     |
| 6           | 48,000     | 49,000    | 49,000    | 21,000    | 422      | 313    | 439    | 330     | 1,050    | 630    | 1,129  | 867     |
| 7           | 22,000     | 6,800     | 18,000    | 100,000   | 444      | 439    | 394    | 345     | 1,012    | 1,122  | 870    | 802     |
| 8           | 610,000    | 290,000   | 380,000   | 420,000   | 105      | 84     | 61     | 65      | 763      | 929    | 906    | 873     |
| 9           | 140,000    | 290,000   | 160,000   | 540,000   | 267      | 190    | 204    | 142     | 1,216    | 1,274  | 1,199  | 954     |
| 10          | 190,000    | 120,000   | 180,000   | 170,000   | 27       | NA     | NA     | NA      | 381      | 412    | 363    | 380     |
| 11          | 1,700,000  | 3,100,000 | 2,400,000 | 2,400,000 | 20       | NA     | NA     | NA      | 153      | 121    | 137    | 112     |
| 12          | 490,000    | 210,000   | 170,000   | 110,000   | 278      | 260    | 269    | 267     | 683      | 926    | 970    | 982     |
| 14          | 1,000,000  | 390,000   | 1,200,000 | 1,000,000 | 30       | 24     | 19     | 11      | 198      | 289    | 312    | 248     |
| 15          | 540,000    | 390,000   | 1,200,000 | 420,000   | 65       | 48     | 72     | 46      | 192      | 171    | 1,084  | 480     |
| 19          | 540,000    | 730,000   | 1,900,000 | 1,300,000 | 289      | 113    | 80     | 16      | 850      | 279    | 292    | 134     |
| 21          | 18,000     | 14,000    | 22,000    | 27,000    | 385      | 289    | 315    | 368     | 1,468    | 1,647  | 1,562  | 1,438   |
| 22          | 280,000    | 550,000   | 300,000   | 830,000   | 210      | 195    | 156    | 102     | 561      | 678    | 624    | 534     |
| 23          | 700,000    | 2,100,000 | 1,400,000 | 1,100,000 | 10       | 10     | 13     | 12      | 364      | 358    | 618    | 460     |
| 24          | 64,000     | 630,000   | 1,100,000 | 300,000   | 271      | 154    | 135    | 93      | 2,375    | 1,618  | 870    | 859     |
| 26          | 230,000    | 510,000   | 970,000   | 990,000   | 506      | 402    | 265    | 230     | 1,333    | 1,609  | 1,453  | 1,386   |
| 27          | 320,000    | 1,700,000 | 2,000,000 | 1,500,000 | 117      | 137    | 66     | 35      | 498      | 751    | 409    | 484     |
| 28          | 810,000    | 1,100,000 | 2,700,000 | 7,800,000 | 62       | 114    | 41     | 25      | 296      | 586    | 683    | 390     |
| 29          | 54,000     | 150,000   | 170,000   | 47,000    | 543      | 463    | 437    | 357     | 1,413    | 1,636  | 1,657  | 1,509   |
| 34          | 17,000     | 160,000   | 170,000   | 170,000   | 287      | 336    | 323    | 195     | 1,486    | 1,891  | 1,267  | 1,199   |
| 35          | 40,000     | 100,000   | 190,000   | 160,000   | 367      | 414    | 317    | 251     | 1,183    | 1,329  | 1,582  | 1,194   |
| 36          | 95,000     | 670,000   | 2,100,000 | 4,300,000 | 65       | 56     | 30     | 20      | 647      | 562    | 526    | 320     |
| 37          | 26,000     | 93,000    | 120,000   | 130,000   | 459      | 529    | 440    | 293     | 1,586    | 1,322  | 1,897  | 1,275   |
| 41          | 150,000    | 450,000   | 650,000   | 810,000   | 183      | 110    | 72     | 24      | 914      | 1,052  | 1,051  | 661     |
| 43          | 36,000     | 170,000   | 160,000   | 290,000   | 165      | 186    | 175    | 103     | 510      | 930    | 733    | 505     |
| 44          | 43,000     | 100,000   | 71,000    | 480,000   | 169      | 121    | 102    | 67      | 674      | 770    | 619    | 446     |
| 46          | 91,000     | 210,000   | 760,000   | 2,200,000 | 212      | 163    | 86     | 78      | 954      | 1,144  | 603    | 1,390   |
| 47          | 82,000     | 400,000   | 660,000   | 320,000   | 45       | 28     | 21     | 10      | 414      | 311    | 325    | 169     |
| 48          | 9,400      | 61,000    | 100,000   | 16,000    | 214      | 300    | 169    | 188     | 512      | 550    | 647    | 328     |
| 50          | 77,000     | 460,000   | 640,000   | 1,700,000 | 173      | 126    | 92     | 86      | 983      | 1,092  | 795    | 1,157   |
| 51          | 13,000     | 140,000   | 150,000   | 180,000   | 241      | 231    | 266    | 234     | 301      | 399    | 498    | 620     |
| 52          | 79,000     | 890,000   | 650,000   | 620,000   | 74       | 30     | 16     | 14      | 692      | 481    | 489    | 342     |
| 53          | 66,000     | 450,000   | 350,000   | 700,000   | 82       | 101    | 45     | 33      | 264      | 479    | 282    | 173     |
| 56          | 21,000     | 190,000   | 160,000   | 460,000   | 261      | 265    | 216    | 158     | 609      | 646    | 587    | 647     |

Table S2. Viral Load, CD4 and CD8 Counts for all patients at all 4 test points. All patients are subtype B except 3 and 53 who are B/F.
