# Supplementary material for: Fitness Cost of Antiretroviral Drug Resistance Mutations on the pol Gene during Analytical Antiretroviral Treatment Interruption among Individuals Experiencing Virological Failure
Source: MDPI journal article supplement (doi:10.3390/pathogens10111425), 2021-11-03
Supplement: s1 [file s1]

[illegible]

Table S3. Mutations (Pre- & Post- ATI) by Codon and ARV Drugs Used by Patients Prior to ATI. "x" indicates that a mutation was present. The drug names are indicated in Table S1.
