# Supplementary material for: Fitness Cost of Antiretroviral Drug Resistance Mutations on the pol Gene during Analytical Antiretroviral Treatment Interruption among Individuals Experiencing Virological Failure
Source: MDPI journal article supplement (doi:10.3390/pathogens10111425), 2021-11-03
Supplement: s1 [file s1]

| <i><b>Class</b></i> | <i><b>Drug</b></i> | <i><b>Number<br/>n = 36</b></i> | <i><b>Percent of<br/>Cases</b></i> |
|---------------------|--------------------|---------------------------------|------------------------------------|
| NRTI                | abacavir (ABC)     | 3                               | 8.33                               |
| NRTI                | AZT/3TC            | 4                               | 11.11                              |
| NRTI                | didanosine (ddI)   | 25                              | 69.44                              |
| NRTI                | lamivudine (3TC)   | 31                              | 86.11                              |
| NRTI                | stavudine (d4T)    | 30                              | 83.33                              |
| NRTI                | zidovudine (AZT)   | 31                              | 86.11                              |
| NNRTI               | delavirdine (DDC)  | 4                               | 11.11                              |
| NNRTI               | efavirenz (EFV)    | 3                               | 8.33                               |
| NNRTI               | nevirapine (NVP)   | 15                              | 41.67                              |
| PI                  | indinavir (IDV)    | 26                              | 72.22                              |
| PI                  | saquinavir (SQV)   | 23                              | 63.89                              |
| PI                  | ritonavir (RTV)    | 29                              | 80.56                              |
| PI                  | nelfinavir (NFV)   | 12                              | 33.33                              |
| PI                  | amprenavir (APV)   | 2                               | 5.56                               |
